# Supplementary material for: Analyzing chaos and superposition of lump waves with other waves in the time-fractional coupled nonlinear schördinger equation
Source: PubMed Central journal article supplement (PMC11356411; doi:10.1371/journal.pone.0304334), 2024-08-28
Supplement: pone.0304334.s001.pdf [file pone.0304334.s001.pdf]

**Manuscript ID:** PONE-D-24-08941R1

**Title:** Analyzing chaos and superposition of lump waves with other waves in the time-fractional coupled nonlinear Schrödinger equation

---

### 1) The values behind the means, standard deviations, and other measures reported

**Model:** The time fractional coupled nonlinear Schrödinger equation, which explains the interaction between modes in nonlinear optics and Bose-Einstein condensation.

**Methods:** we are using two advanced and powerful techniques to solve the non-linear model and obtain the new solitary wave solutions.

- Generalized projective Riccati equation method.
- Modified auxiliary equation method.

To make it more flavorful we add a Dynamical investigation.

- Chaos analysis.

**Software:** we use three different software.

- Overleaf: for writing (<https://www.overleaf.com/project>)
  - Mathematica: for plotting graphs (<https://www.wolfram.com/mathematica/online/>)
  - Maple: for calculations (<https://www.maplesoft.com/products/Maple/>)
- 

### 2) The values used to build graphs for soliton solutions using generalized projective Riccati equation method.

#### Graph values:

In “Figure 1”, we express the solutions of  $\psi_{2,1}(x, t)$  with parameters,  $\delta = 1.3$ ,  $\Gamma = 0.25$ ,  $\kappa = -1.25$ ,  $f = 0.45$ ,  $\beta = 0.5$ ,  $\theta = 0.75$ ,  $r = 0.65$ ,  $v = 0.9$ ,  $\sigma = 1.36$ ,  $\ell = -0.63$  and  $\Omega = 1.25$ .

In “Figure 2”, we express the travelling wave for  $\psi_{3,2}(x, t)$  with parameters,  $\delta = 1.3$ ,  $\Gamma = 0.25$ ,  $\kappa = -1.25$ ,  $f = 0.45$ ,  $\beta = 0.5$ ,  $\theta = 0.75$ ,  $r = 0.65$ ,  $v = 0.2$ ,  $\sigma = 1.36$ ,  $\ell = -0.62$  and  $\Omega = 1.25$ .

In “Figure 3”, we express the solutions of  $\psi_{6,1}(x, t)$  with parameters,  $\delta = 1.3$ ,  $\Gamma = 0.25$ ,  $\kappa = -1.25$ ,  $f = 0.45$ ,  $\beta = 0.3$ ,  $\theta = 0.75$ ,  $r = 0.65$ ,  $v = 0.9$ ,  $\sigma = 1.36$ ,  $\ell = -1.25$  and  $\Omega = 1.25$ .

In “Figure 4”, we express the travelling wave  $\psi_{7,2}(x, t)$  with parameters,  $\delta = 1.3$ ,  $\Gamma = 1.25$ ,  $\kappa = 1.5$ ,  $f = 0.45$ ,  $c = 2.5$ ,  $\beta = -0.3$ ,  $\theta = 0.75$ ,  $r = 0.65$ ,  $v = 0.9$ ,  $\sigma = 1.36$ ,  $\ell = -1.25$  and  $\Omega = 1.25$ .

### 3) The values used to build graphs for soliton solutions using modified auxiliary equation method.

#### Graph values:

In “Figure 5”, we express the solutions of travelling wave for  $\psi_{8,1}(x, t)$  with parameters,  $\zeta = 1.3$ ,  $\Gamma = 0.25$ ,  $\kappa = 0.5$ ,  $f = 0.45$ ,  $v = 0.5$ ,  $\beta = -1.95$ ,  $\kappa = 0.175$ ,  $r = 0.65$ ,  $v = -1.75$ ,  $\sigma = 1.36$ ,  $\ell = 1.25$  and  $\Omega = 1.25$ .

In “Figure 6”, we express the travelling wave for  $\psi_{11,1}(x, t)$  with parameters,  $\zeta = -2.3$ ,  $\Gamma = 0.25$ ,  $\varkappa = 0.5$ ,  $f = 0.45$ ,  $v = 0.5$ ,  $\beta = 0.63$ ,  $\kappa = 0.175$ ,  $r = 0.65$ ,  $v = 1.9$ ,  $\sigma = 1.36$ ,  $\ell = -1.25$  and  $\Omega = 1.25$

In “Figure 7”, we express the solutions of  $\psi_{14,2}(x, t)$  with parameters,  $\zeta = 1.3$ ,  $\Gamma = 0.25$ ,  $\varkappa = 0.5$ ,  $f = 0.45$ ,  $v = 0.5$ ,  $\beta = 0.63$ ,  $\kappa = 0.75$ ,  $r = 0.65$ ,  $v = 0.09$ ,  $\sigma = 1.36$ ,  $\ell = -1.5$  and  $\Omega = 1.25$

In “Figure 8”, we express the travelling wave  $\psi_{16,1}(x, t)$  with parameters,  $\zeta = 1.3$ ,  $\Gamma = 0.25$ ,  $\varkappa = 0.5$ ,  $f = 0.45$ ,  $v = 0.5$ ,  $\beta = -2.3$ ,  $\kappa = 0.75$ ,  $r = 0.65$ ,  $v = 2.9$ ,  $\sigma = 1.36$ ,  $\ell = -1.25$  and  $\Omega = 1.25$

#### 4) Chaotic analysis

In chaotic analysis “Figs 9-11” describes the Galilean transformation process can introduce chaotic analysis to the time-fractional coupled nonlinear Schrodinger equation within the dynamical system.

In “Figure 9”, Profile of periodic with parametric values,  $\varkappa = 0.03$ ,  $\Omega = 0.05$ ,  $f = 0.06$ ,  $\sigma = 0.08$ ,  $\omega = 0.08$ ,  $r = 0.07$  and the perturbation term,  $x = 0.09$ ,  $Y_0 = 0.002$ .

In “Figure 10”, Profile of Quasi-periodic with parametric values,  $\varkappa = 0.03$ ,  $\Omega = 0.05$ ,  $f = 0.06$ ,  $\sigma = 0.01$ ,  $\omega = 0.06$ ,  $r = 0.07$  and the perturbation term,  $x = 2.9$  and  $Y_0 = 0.5$ .

In “Figure 11”, Profile of Quasi-periodic chaotic with parametric values,  $\varkappa = 0.03$ ,  $\Omega = 0.05$ ,  $f = 0.06$ ,  $\sigma = 0.01$ ,  $\omega = 0.08$ ,  $r = 0.07$  and the perturbation term,  $x = 4.1$  and  $Y_0 = 1.2$ .

---
